# Supplementary material for: Screening the Pathogen Box to Discover and Characterize New Cruzain and TbrCatL Inhibitors
Source: MDPI journal article supplement (doi:10.3390/pathogens12020251), 2023-02-04
Supplement: s1 [file s1]

# Supplementary Material

## Screening the Pathogen box to discover and characterize new cruzain and *Tbr*CatL inhibitors

Thales do Valle Moreira <sup>1†</sup>, Luan Carvalho Martins <sup>1†</sup>, Lucas Abreu Diniz <sup>1</sup>, Talita Cristina Diniz Bernardes <sup>1</sup>,  
Renata Barbosa de Oliveira <sup>2</sup>, and Rafaela Salgado Ferreira <sup>1,\*</sup>

<sup>1</sup> Molecular Modeling and Drug Design Laboratory. Institute for Biological Sciences. Federal University of Minas Gerais. 6627, Antônio Carlos Avenue. 31270-901. Belo Horizonte-MG, Brazil.

<sup>2</sup> Pharmaceutical Products Department. Federal University of Minas Gerais. 6627, Antônio Carlos Avenue. 31270-901. Belo Horizonte-MG, Brazil.

\* Correspondence: [rafaelasf@icb.ufmg.br](mailto:rafaelasf@icb.ufmg.br)

† these authors contributed equally to this work

**Table S1** – Effect of **MMV676409** and **MMV676512** in the initial velocities of the enzymatic reactions, after 10 minutes of pre-incubation of the enzyme and the compound. All effects were calculated in respect to the DMSO control.

| Compound                                                                                                   | Increase in the initial velocity of the reaction (%) |                 |                                              |                 |                                            |                 |
|------------------------------------------------------------------------------------------------------------|------------------------------------------------------|-----------------|----------------------------------------------|-----------------|--------------------------------------------|-----------------|
|                                                                                                            | 5 $\mu$ M using PB samples <sup>a</sup>              |                 | 100 $\mu$ M using solid samples <sup>b</sup> |                 | 5 $\mu$ M using solid samples <sup>b</sup> |                 |
|                                                                                                            | Cruzain                                              | <i>Tbr</i> CatL | Cruzain                                      | <i>Tbr</i> CatL | Cruzain                                    | <i>Tbr</i> CatL |
| 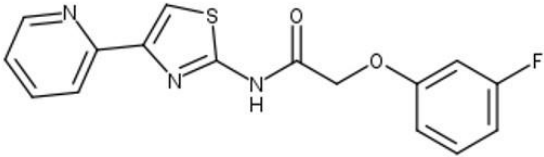 <p><b>MMV676409</b></p>  | 510 $\pm$ 216                                        | 772 $\pm$ 382   | 0 $\pm$ 6                                    | ND              | -4 $\pm$ 2                                 | ND              |
|  <p><b>MMV676512</b></p> | 84 $\pm$ 54                                          | 109 $\pm$ 71    | 24 $\pm$ 5                                   | ND              | 14 $\pm$ 9                                 | ND              |

<sup>a</sup>: experiments performed using the solutions from the PB compound library. <sup>b</sup>: experiments performed using solutions prepared from the solid samples. ND: not determined.

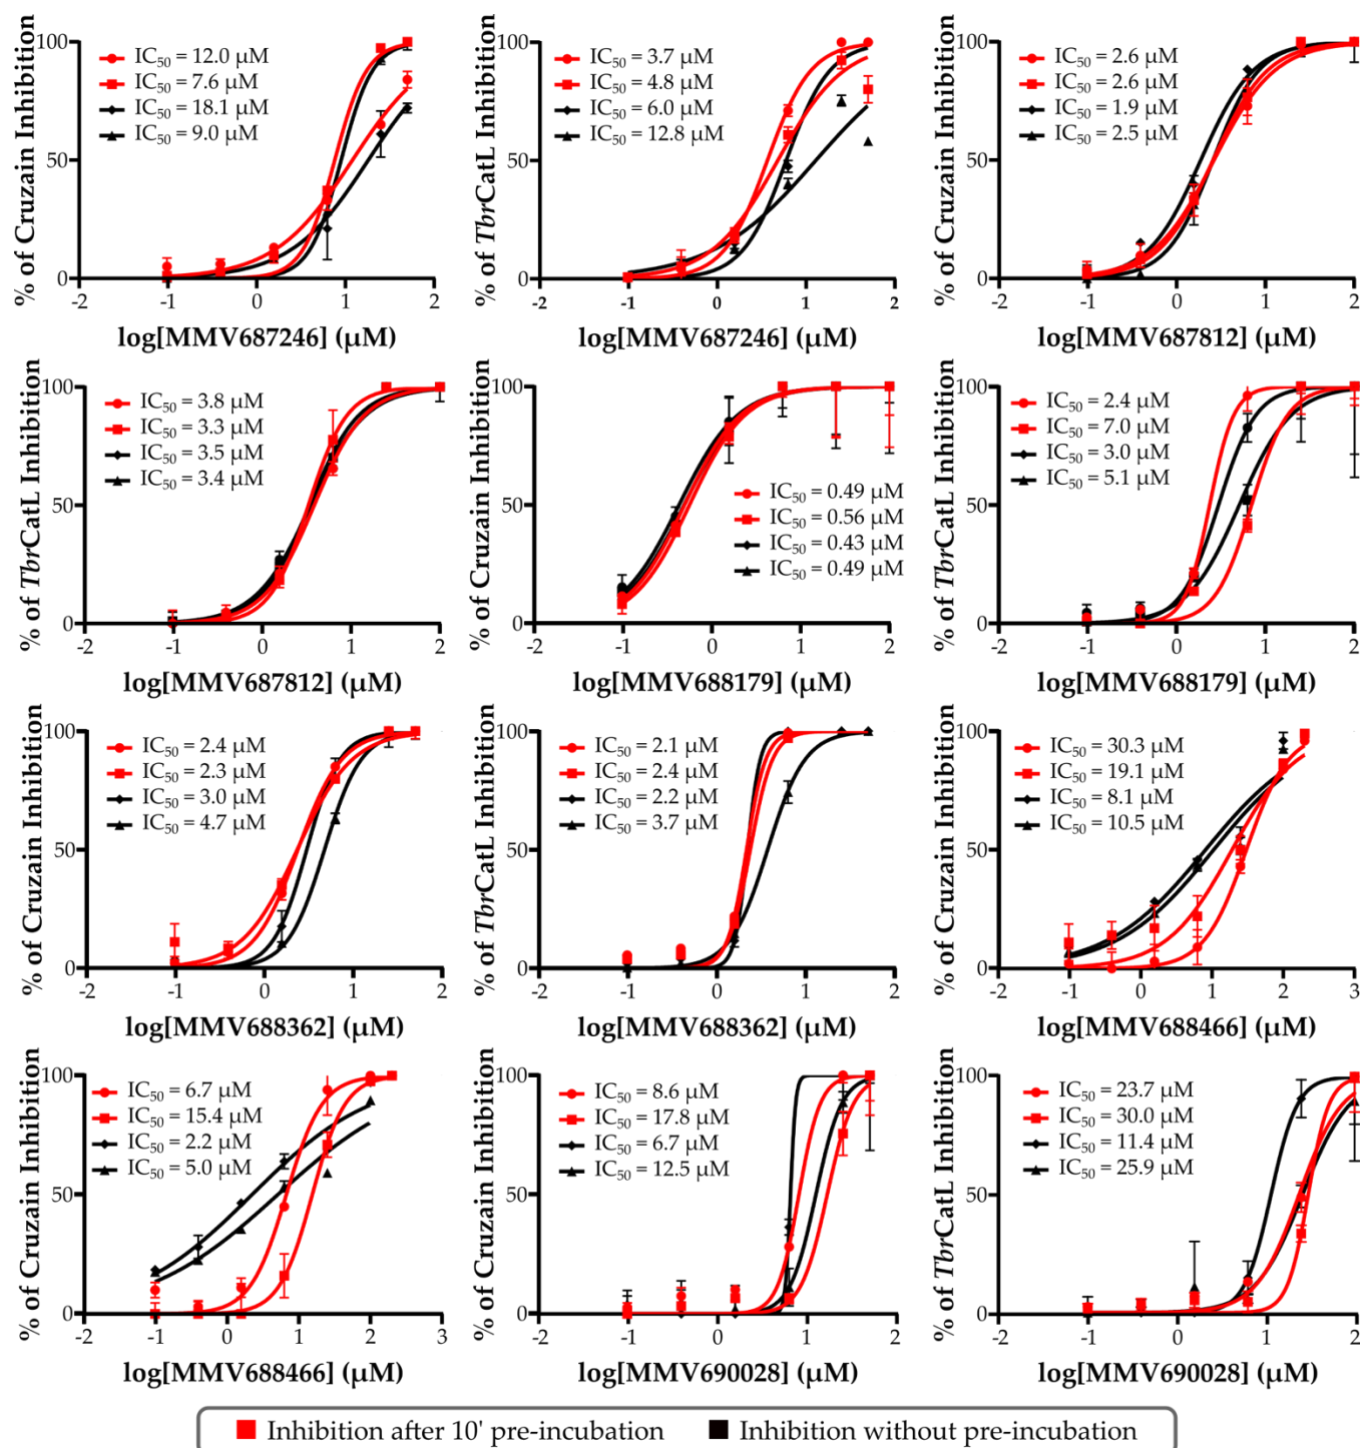

**Figure S1** – IC<sub>50</sub> curves for compounds MMV687246, MMV687812, MMV688179, MMV688362, MMV688466, MMV690028 against cruzain and *Tbr*CatL. For each compound/enzyme pair, four curves are reported, two obtained in experiments with a ten minute pre-incubation of the compounds with the enzymes (red) and two obtained in experiments without pre-incubation (black curves). Each curve was determined based on at least seven compound concentrations, in triplicate. All percentages of inhibition were calculated based on a DMSO control.

**Table S2** – Cruzain inhibition by hits from the initial screening, at varying assay conditions.

| Compound  | Concentration of<br>the compound<br>evaluated ( $\mu\text{M}$ ) | % Cruzain Inhibition (Mean $\pm$ SEM) <sup>a</sup> |                       |                        |                                    |
|-----------|-----------------------------------------------------------------|----------------------------------------------------|-----------------------|------------------------|------------------------------------|
|           |                                                                 | 0.1% Triton X-<br>100                              | 0.01% Triton<br>X-100 | 0.001% Triton<br>X-100 | 0.001% Triton<br>+ BSA 1 mg/<br>mL |
| MMV687246 | 12.5                                                            | 32 $\pm$ 2                                         | 51 $\pm$ 0            | 62 $\pm$ 3             | 45 $\pm$ 1                         |
| MMV687812 | 3.125                                                           | 54 $\pm$ 1                                         | 95 $\pm$ 0            | 92 $\pm$ 0             | 85 $\pm$ 1                         |
| MMV688179 | 1.563                                                           | 82 $\pm$ 13                                        | 80 $\pm$ 1            | 85 $\pm$ 6             | 89 $\pm$ 8                         |
| MMV688362 | 3.125                                                           | 25 $\pm$ 2                                         | 41 $\pm$ 2            | 59 $\pm$ 2             | 29 $\pm$ 3                         |
| MMV688466 | 6.25                                                            | 82 $\pm$ 11                                        | 32 $\pm$ 5            | 83 $\pm$ 3             | 96 $\pm$ 3                         |
| MMV690028 | 25                                                              | 100 $\pm$ 0                                        | 100 $\pm$ 0           | 69 $\pm$ 14            | 91 $\pm$ 7                         |

<sup>a</sup>: mean over two independent experiments, in triplicates.

**Table S3** – Cruzain inhibition by analogues of compound **MMV688179**.

| Compound | Structure                                                                         |                                                                                     |                                                                                   | % Cruzain Inhibition at 100 $\mu$ M (Mean $\pm$ SEM) <sup>a</sup> | Comments                                            |
|----------|-----------------------------------------------------------------------------------|-------------------------------------------------------------------------------------|-----------------------------------------------------------------------------------|-------------------------------------------------------------------|-----------------------------------------------------|
|          | R1                                                                                | R2                                                                                  | R3                                                                                |                                                                   |                                                     |
| 1        | H                                                                                 | H                                                                                   | H                                                                                 | ND                                                                | Solubility issues                                   |
| 2        | H                                                                                 |    | H                                                                                 | 0 $\pm$ 6                                                         | -                                                   |
| 3        | H                                                                                 |    | H                                                                                 | ND                                                                | Solubility issues                                   |
| 4        |  |    |  | ND                                                                | Fluorescence, interference with the assay readout   |
| 5        | H                                                                                 |  | H                                                                                 | ND                                                                | Fluorescence, interference with the assay readout   |
| 6        | H                                                                                 |  | H                                                                                 | 57 $\pm$ 4                                                        | Fluorescence, interference with the assay readout   |
| 7        | H                                                                                 |  | H                                                                                 | 65 $\pm$ 4                                                        | Insoluble at concentrations higher than 100 $\mu$ M |

ND = not determined <sup>a</sup>: mean over two independent experiments, in triplicates.
