# Supplementary material for: Screening the Pathogen Box to Discover and Characterize New Cruzain and TbrCatL Inhibitors
Source: Pathogens. 2023 Feb 4;12(2):251. doi: 10.3390/pathogens12020251 (PMC9967275; doi:10.3390/pathogens12020251)
Supplement: Supplementary file 1 [file pathogens-12-00251-s001.zip › SupplementaryMaterial1.xlsx]

## Sheet: Screening results
Compound	TbrCatL				Cruzain
	0’		10’		0’		10’
	Inhibition	SEM	Inhibition	SEM	Inhibition	SEM	Inhibition	SEM
MMV010764	0.142	0.01	0.189	0.04	0.137	0.04	0.164	0.01
MMV688472	0.131	0	0.14	0.05	0.17	0.03	0.137	0.04
MMV688416	0.216	0.06	0.267	0.02	0.183	0.05	0.181	0.01
MMV689758	0.086	0.01	-0.014	0.06	0.19	0.06	0.1	0.02
MMV688796	0.072	0.01	-0.024	0.04	0.145	0.05	0.072	0.02
MMV676526	-0.148	0.02	-0.148	0.109	-0.168	0.05	-0.079	0.03
MMV688553	-0.012	0.02	-0.064	0.04	-0.071	0.05	0.009	0.07
MMV676501	-0.036	0.02	-0.113	0.15	-0.082	0.02	-0.161	0.04
MMV676449	0.015	0.03	0.035	0.02	0.045	0.01	0.062	0.04
MMV676412	0.055	0.03	-0.691	0.14	0.059	0.03	-0.272	0.03
MMV1110498	0.128	0.03	0.064	0.03	0.078	0.02	0.087	0.03
MMV000907	0.318	0.03	0.234	0.05	0.095	0.12	0.253	0.05
MMV688889	0.196	0.02	0.131	0.04	0.146	0.03	0.14	0.02
MMV688776	0.127	0.02	0.089	0.02	0.14	0.04	0.107	0.03
MMV688934	0.184	0.01	0.138	0.04	0.151	0.01	0.074	0.02
MMV676389	-0.118	0.01	-0.073	0.062	-0.061	0.03	-0.034	0.03
MMV676603	0.045	0.01	0.028	0.05	0.013	0.02	0.017	0.02
MMV676401	0.065	0.03	0.151	0.02	0.046	0.01	0.089	0.03
MMV102872	0.005	0.02	-0.157	0.08	-0.016	0.03	-0.103	0.01
MMV676477	-0.04	0.07	-0.165	0.03	-0.002	0.01	-0.111	0.03
MMV084603	0.178	0.01	0.046	0.03	0.076	0.02	0.064	0.01
MMV688548	0.195	0.02	0.119	0.04	0.083	0.04	0.097	0.03
MMV688888	0.188	0.01	0.088	0.03	0.18	0.07	0.136	0.03
MMV690028	0.493	0.04	0.227	0.04	0.336	0.08	0.272	0.04
MMV688943	0.145	0.05	0.042	0.01	0.134	0.04	0.096	0.03
MMV053220	-0.057	0.03	-0.069	0.061	-0.089	0.03	-0.05	0.03
MMV676584	-0.005	0.02	-0.091	0.12	-0.027	0.04	0.093	0.06
MMV676439	0.054	0.01	0.052	0.04	-0.001	0.02	0.065	0.03
MMV676395	0.171	0.02	0.187	0.04	0.099	0.03	0.083	0.02
MMV676379	0.089	0.02	0.201	0.01	0.083	0.01	0.14	0.07
MMV687762	0.168	0.02	0.123	0.04	0.087	0.05	0.069	0.02
MMV1028806	0.165	0.02	0.036	0.02	0.241	0.03	0.165	0.05
MMV661713	0.199	0	0.104	0.02	0.203	0.04	0.134	0.03
MMV688793	0.137	0.03	0.104	0.04	0.161	0.06	0.099	0.02
MMV688942	0.125	0.02	-0.014	0.01	0.135	0.03	0.089	0.05
MMV688554	-0.072	0.02	-0.078	0.061	-0.082	0.03	-0.046	0.01
MMV676555	0.03	0.01	-0.046	0.05	-0.014	0.02	0.032	0.04
MMV676383	0.098	0.02	0.075	0.03	0.035	0.01	0.04	0.01
MMV676444	0.092	0.01	0.081	0.02	0.004	0.03	0.055	0.02
MMV676409	-0.773	0.05	-7.721	2.2	-2.266	0.49	-5.101	1.25
MMV688514	0.202	0.02	-0.066	0.02	0.141	0.05	0.127	0.04
MMV676350	0.277	0.04	0.278	0.18	0.166	0.05	0.222	0.07
MMV553002	0.191	0.01	0.186	0.02	0.179	0.02	0.116	0.01
MMV688797	0.164	0.02	0.148	0.02	0.153	0.06	0.104	0.03
MMV688756	0.101	0.03	0.068	0.02	0.137	0.04	0.111	0.05
MMV090930	0.013	0.02	0.003	0.083	-0.177	0.06	0.031	0.03
MMV676431	0.052	0.03	0.049	0.05	0.005	0.03	0.043	0.02
MMV676571	0.084	0.03	0.096	0.03	0.058	0.02	0.04	0.02
MMV676445	0.059	0.01	0.033	0.01	0.012	0.02	0.036	0.02
MMV676589	0.033	0.02	0.044	0.04	0	0.05	0.041	0.04
MMV026020	0.151	0.01	0.198	0.05	0.115	0.02	0.172	0.04
MMV688471	0.262	0.03	0.201	0.05	0.186	0.05	0.148	0.03
MMV676388	0.181	0.01	0.152	0.03	0.148	0.04	0.116	0.02
MMV202553	0.152	0.01	0.068	0.03	0.151	0.04	0.142	0.01
MMV688936	0.189	0.01	0.006	0.03	0.056	0.05	-0.002	0.01
MMV676476	-0.173	0.04	-0.026	0.018	0.019	0.03	-0.033	0.02
MMV676377	0.05	0.01	-0.018	0.03	0.012	0.02	-0.009	0.03
MMV676406	0.168	0.03	0.153	0.06	0.06	0.01	0.062	0.02
MMV676461	0.062	0.03	0.15	0.06	-0.026	0.01	0.04	0.03
MMV676509	0.11	0.04	0.118	0.06	0.206	0.04	0.051	0.04
MMV688470	0.135	0.02	0.088	0.06	0.101	0.05	0.112	0.03
MMV688704	0.159	0.01	0.158	0.05	0.109	0.05	0.104	0.02
MMV188296	0.137	0.01	0.129	0.03	0.097	0.01	0.104	0.03
MMV688958	0.132	0.02	-0.005	0.02	0.129	0.05	0.068	0.03
MMV063404	0.076	0.01	0.021	0.02	0.11	0.02	0.076	0.03
MMV676558	-0.23	0.02	-0.625	0.104	-0.233	0.08	-0.183	0.06
MMV688555	0.061	0.02	0.009	0.03	-0.007	0.02	0.005	0.02
MMV676597	0.096	0.05	0.101	0.05	0.031	0.01	-0.033	0.06
MMV676588	0.142	0.04	0.02	0.02	0.111	0.01	0.126	0.02
MMV676554	0.096	0.04	0.045	0.03	0.028	0.01	0.005	0.03
MMV688350	0.021	0.02	-0.091	0.05	-0.068	0.08	-0.048	0.03
MMV688360	0.126	0.01	0.159	0.02	0.143	0.03	0.11	0.03
MMV099637	0.079	0.02	0.071	0.05	0.121	0.04	0.056	0.03
MMV688798	0.015	0.02	-0.019	0.04	0.126	0.05	0.012	0.03
MMV676539	0.098	0.03	0.2	0.08	0.135	0.03	0.141	0.03
MMV202458	-0.156	0.02	-0.189	0.045	-0.137	0.03	-0.113	0.04
MMV676474	-0.038	0	-0.174	0.07	-0.073	0.02	-0.11	0.04
MMV461553	-0.163	0.02	0.091	0.22	-0.335	0.06	-0.241	0.22
MMV676520	0.051	0.03	-0.047	0.01	-0.012	0	-0.033	0.02
MMV676512	-0.268	0.02	-1.089	0.41	-0.271	0.07	-0.839	0.31
MMV676480	0.005	0.02	-0.032	0.01	0.236	0.06	0.056	0.04
MMV652003	-0.056	0.01	-0.017	0.02	0.216	0.06	0.16	0.08
MMV000062	0.031	0.04	-0.031	0.03	0.192	0.15	0.132	0.06
MMV006372	0.099	0.03	0.141	0.03	0.265	0.06	0.213	0.05
MMV688854	0.027	0.01	-0.048	0.02	0.269	0.09	0.113	0.07
MMV011903	-0.182	0.05	-0.428	0.02	-0.012	0	-0.154	0.02
MMV020591	-0.084	0.05	-0.037	0.01	-0.017	0	-0.004	0.02
MMV020623	-0.056	0.06	0.042	0.01	0.003	0.01	0.049	0.02
MMV020512	-0.032	0.07	-0.002	0.03	0.002	0	0.077	0.03
MMV688761	-0.009	0.04	0.012	0.01	-0.003	0.01	0.057	0.02
MMV012074	-0.002	0.01	0.056	0.02	0.245	0.05	0.121	0.05
MMV676604	0.029	0.03	-0.256	0.04	0.222	0.07	0.032	0.06
MMV002529	0.048	0.02	0.057	0.04	0.224	0.13	0.177	0.05
MMV687776	-0.001	0.04	-0.045	0.04	0.252	0.07	0.167	0.03
MMV687800	0.011	0.02	0.031	0.01	0.232	0.07	0.099	0.06
MMV020982	-0.06	0.05	-0.07	0.01	0.013	0.01	-0.005	0.02
MMV020120	-0.023	0.05	0.038	0.02	0.013	0.01	-0.005	0.02
MMV676605	0.069	0.05	-0.133	0.01	0.074	0	-0.009	0.01
MMV007638	0.006	0.05	0.092	0.01	0.07	0.01	0.103	0.03
MMV021057	0.019	0.04	0.086	0.02	0.016	0.01	0.065	0.01
MMV690027	0.064	0.02	-0.018	0.06	0.504	0.05	0.333	0.02
MMV676600	0.075	0.02	0.109	0.02	0.242	0.06	0.122	0.02
MMV676382	0.047	0.01	0.075	0.04	0.173	0.11	0.147	0.03
MMV001625	0.021	0.02	-0.019	0.03	0.197	0.03	0.073	0.01
MMV001493	0.013	0.01	-0.024	0.02	0.26	0.07	0.117	0.01
MMV020136	-0.064	0.05	-0.056	0.02	0.049	0.02	0.02	0.01
MMV020710	-0.099	0.07	-0.992	0.07	-0.111	0.03	-0.364	0.05
MMV020517	0.027	0.04	0.093	0.01	0.042	0.01	0.067	0.01
MMV019721	0.05	0.06	-0.026	0.01	0.064	0.01	0.064	0.02
MMV688763	0.075	0.04	0.017	0.02	0.058	0.01	0.089	0
MMV020537	0.082	0.04	0.059	0.05	0.175	0.03	0.089	0.01
MMV637953	-0.044	0.03	-0.002	0.04	0.316	0.04	0.211	0
MMV676536	0.132	0.02	0.331	0.03	0.181	0.1	0.159	0.03
MMV000063	0.027	0.02	0.056	0.04	0.158	0.05	0.029	0.03
MMV689255	0.034	0.01	-0.013	0.03	0.177	0.06	0.021	0.02
MMV019838	-0.081	0.05	-0.052	0.02	0.02	0.01	0.161	0.1
MMV020520	0.016	0.04	0.1	0.02	0.047	0.01	0.034	0.01
MMV019234	0.072	0.05	0.218	0.02	0.066	0.01	0.084	0.04
MMV016136	0.032	0.05	0.061	0.02	0.047	0.01	0.045	0
MMV688762	0.032	0.04	0.018	0.01	0.032	0.01	0.01	0.01
MMV676386	0.028	0.02	0.018	0.02	0.084	0.03	0.026	0.04
MMV688773	0.043	0.01	0.037	0.02	0.191	0.06	0.041	0.01
MMV000011	0.065	0.01	0.024	0.03	0.087	0.06	0.095	0.02
MMV687775	-0.005	0.01	-0.077	0.03	0.125	0.03	-0.04	0.01
MMV002817	0.005	0.01	-0.244	0.06	0.002	0.03	-0.157	0.04
MMV676442	-0.075	0.05	-0.063	0.01	0.042	0.03	0.012	0.02
MMV020152	-0.021	0.05	0.011	0.01	0.037	0.02	-0.004	0.01
MMV024397	0.026	0.05	0.026	0.04	0.029	0.01	0.058	0.01
MMV019807	0.049	0.06	0.088	0.02	0.083	0.01	0.071	0.01
MMV560185	0.045	0.04	-0.024	0.03	0.055	0.01	-0.045	0.03
MMV019189	-0.207	0.02	0.136	0.12	-0.168	0.1	-0.215	0.02
MMV688774	0.036	0.01	0.082	0.05	0.087	0.01	0.104	0.02
MMV003270	0.081	0.02	0.014	0.05	0.044	0.08	0.073	0.01
MMV637229	0.037	0.03	-0.015	0.02	0.041	0.04	0.029	0.03
MMV688853	0.067	0.02	-0.04	0	0.054	0.03	0.039	0.03
MMV020321	-0.087	0.05	-0.099	0.01	0.003	0.01	-0.008	0.01
MMV019087	0.043	0.06	0.031	0.04	0.016	0.01	0.026	0.03
MMV676528	-0.029	0.05	0.018	0.02	0.037	0	0.06	0.01
MMV020320	-0.002	0.06	0.04	0.04	0.045	0.01	0.022	0.01
MMV085210	0.105	0.04	0.078	0.02	0.045	0.01	0.065	0.03
MMV069458	0.039	0.02	0	0.03	0.021	0.06	-0.041	0.02
MMV688991	0.098	0.04	0.037	0.03	0.079	0.01	0.042	0.02
MMV687801	0.069	0.03	0.004	0.03	-0.045	0.04	0.004	0.03
MMV689480	0.041	0.03	-0.021	0.04	0.063	0.04	0.048	0.05
MMV003152	0.047	0.01	-0.053	0.02	0.033	0.03	-0.014	0.03
MMV006239	0.026	0.06	0.026	0.1	0.075	0.01	0.022	0.04
MMV000858	0.009	0.04	0.06	0.07	0.081	0.01	0.125	0.08
MMV006741	0.151	0.05	0.054	0.05	0.077	0.02	0.102	0.02
MMV688768	0.009	0.06	0.024	0.03	0.027	0	0.09	0.03
MMV000023	0.091	0.01	0.049	0.04	0.028	0.01	0.064	0.04
MMV676602	0.04	0.01	0.015	0.07	0.009	0.03	-0.06	0.02
MMV000016	0.024	0.02	-0.026	0.04	-0.054	0.03	-0.087	0.02
MMV687803	0.038	0.01	-0.001	0.02	-0.077	0.04	-0.039	0.01
MMV668727	0.066	0.02	-0.046	0.02	0.106	0.04	-0.03	0.03
MMV019742	0.035	0.02	-0.025	0.02	-0.048	0.04	-0.029	0.03
MMV009054	-0.14	0.06	-0.155	0.01	-0.018	0.01	-0.021	0.01
MMV006901	0.094	0.04	0.196	0.17	0.134	0.01	0.244	0.15
MMV020391	-0.034	0.06	-0.025	0.03	-0.015	0.01	0.02	0.02
MMV676380	-0.052	0.08	-0.03	0.02	0.006	0.01	-0.009	0.01
MMV688994	0.011	0.04	0.015	0.02	-0.04	0.01	-0.023	0.01
MMV675997	0.016	0.02	0.049	0.04	0.012	0.03	0.032	0.03
MMV676204	0.026	0.04	-0.013	0.04	0.058	0.01	0.047	0.02
MMV687239	0.011	0.04	-0.059	0.06	0.069	0.03	-0.029	0.03
MMV688122	0.193	0.03	-0.082	0.04	-0.014	0.04	-0.168	0.03
MMV688852	-0.027	0.01	-0.133	0.04	0.062	0.03	0.005	0
MMV687145	-0.03	0.02	-0.019	0.02	-0.046	0.03	-0.062	0.05
MMV688327	-0.055	0.01	0.064	0.01	-0.035	0.02	0.042	0.03
MMV008439	-0.05	0.02	-0.034	0.01	0.003	0.02	0	0.04
MMV595321	-0.231	0.03	-0.287	0.01	-0.125	0.04	-0.038	0.04
MMV687747	0.021	0.01	-0.003	0.01	0.064	0.02	0.059	0.03
MMV020388	0.033	0.04	0.002	0.03	0.034	0.02	0.045	0.01
MMV688547	0.06	0.04	0.039	0.06	0.098	0.01	0.13	0.01
MMV688466	0.286	0.02	0.543	0.08	0.41	0.02	0.487	0.05
MMV687749	0.064	0.03	0.056	0.02	0.137	0.03	0.126	0.02
MMV688846	0.025	0.03	-0.174	0.01	0.101	0.02	0.03	0.01
MMV054312	0.092	0.03	0.193	0.03	0.1	0.01	0.114	0.03
MMV689060	-0.049	0.02	0.021	0.03	-0.029	0.01	-0.001	0.04
MMV689061	0	0.02	0.008	0.01	0.012	0.03	0.036	0.04
MMV689028	-0.006	0.01	-0.003	0.01	-0.006	0.02	0.078	0.03
MMV688371	0.062	0.01	0.01	0.01	0.091	0.01	0.119	0.03
MMV688508	-0.007	0.04	-0.048	0.04	-0.001	0.02	-0.021	0.01
MMV688283	0.242	0.03	0.181	0.03	0.297	0.01	0.313	0.03
MMV687243	-0.024	0.05	-0.183	0.04	0.079	0.05	0.08	0.02
MMV687730	0.193	0.02	0.117	0.05	0.119	0.04	0.044	0.02
MMV687251	0.027	0.02	0.004	0.04	0.118	0.02	0.028	0
MMV687254	-0.072	0.06	-0.026	0.02	-0.102	0.02	-0.05	0.05
MMV688509	-0.132	0.03	-0.126	0	-0.038	0.02	0.038	0.04
MMV688361	0.019	0.03	-0.035	0.01	0.045	0.02	0.074	0.02
MMV689029	0.007	0.01	0.012	0	0.025	0	0.054	0.04
MMV022236	0.074	0.02	0.162	0	0.072	0.02	0.164	0.02
MMV688410	-0.047	0.03	-0.035	0.05	-0.005	0.03	0.038	0.02
MMV676048	0.008	0.05	-0.038	0.04	0.028	0.03	0.057	0.02
MMV687703	0.258	0.02	0.164	0.04	0.14	0.03	0.114	0.03
MMV687248	-0.007	0.03	0.168	0.1	0.17	0.05	0.189	0.06
MMV688125	-0.023	0.02	-0.047	0.04	0.044	0.05	0.093	0.06
MMV687188	-0.005	0.02	0.029	0.01	0.008	0.02	0.047	0.03
MMV690103	-0.176	0.02	-0.216	0.01	-0.027	0.05	0.157	0
MMV688124	-0.033	0.02	0.01	0.02	-0.018	0.03	0.029	0.05
MMV688845	-0.003	0.01	0.023	0.02	0.01	0.01	0.045	0.04
MMV1030799	-0.077	0.01	-0.11	0.02	-0.034	0.02	0.024	0.01
MMV675994	-0.018	0.03	0.109	0.04	0.05	0.02	0.142	0.01
MMV676057	-0.023	0.04	-0.123	0.02	-0.015	0.02	-0.034	0.06
MMV687699	-0.016	0.04	-0.062	0.04	0.033	0.04	0.073	0.05
MMV687146	-0.011	0.03	-0.123	0.07	0.047	0.02	0.047	0.02
MMV687696	-0.045	0.03	-0.036	0.03	0.047	0.04	0.018	0.01
MMV687170	0.149	0.06	0.034	0.01	0.06	0.01	0.068	0.04
MMV690102	-0.025	0.07	0.137	0.01	0.004	0.05	0.119	0.04
MMV689709	0.083	0.04	0.038	0.01	-0.014	0.02	0.013	0.01
MMV021375	0.167	0.05	0.195	0.02	0.175	0.02	0.23	0.02
MMV1029203	-0.102	0.05	-0.067	0.02	-0.062	0.04	0.277	0.02
MMV676053	0.012	0.02	0.015	0.03	0	0.03	0.017	0
MMV688179	0.5	0.03	0.576	0.25	1.021	0.04	1.098	0.04
MMV023969	0.192	0.01	0.166	0.07	0.293	0.02	0.314	0.03
MMV687138	0.002	0.02	-0.024	0.02	0.024	0.02	0.041	0.01
MMV688262	0.007	0.01	-0.014	0.02	-0.001	0.02	-0.004	0
MMV687189	0.026	0.02	0.048	0.02	0.045	0.03	-0.011	0.05
MMV687807	-0.042	0.02	-0.052	0.01	-0.003	0.02	0.061	0.05
MMV676478	0.022	0.03	-0.08	0.01	0.009	0.04	0.025	0.03
MMV062221	-0.324	0.03	-0.717	0.01	-0.212	0.05	-0.031	0.05
MMV688921	0.055	0.02	0.044	0.02	0.047	0.02	0.106	0.04
MMV676191	-0.03	0.02	0.021	0.08	0.028	0.03	0.015	0.01
MMV675993	-0.071	0.04	-0.056	0.08	-0.07	0.03	-0.018	0.02
MMV021660	-0.036	0.02	0.069	0.07	0.114	0.03	0.137	0.02
MMV688417	-0.107	0.04	-0.132	0.05	0.056	0.07	-0.014	0.01
MMV687273	-0.032	0.03	-0.043	0.05	-0.016	0.02	0.028	0.02
MMV687180	-0.043	0.02	-0.111	0	-0.086	0.03	-0.067	0.04
MMV1088520	-0.058	0	-0.244	0.03	-0.171	0.05	-0.149	0.05
MMV688891	0	0.03	-0.026	0.01	-0.044	0.05	-0.007	0.04
MMV023370	0.033	0.01	-0.015	0.01	-0.035	0.04	0.078	0.03
MMV688703	0.058	0.01	0.036	0.01	0.037	0.02	0.019	0.03
MMV675969	-0.046	0.02	-0.059	0.03	-0.079	0.01	-0.05	0
MMV688313	-0.189	0.04	-0.266	0.04	-0.158	0.01	-0.099	0.03
MMV687172	0.003	0.02	0.148	0.19	-0.024	0.04	-0.019	0.02
MMV688844	0.04	0.02	-0.015	0.05	0.014	0.01	-0.011	0.01
MMV1198433	-0.048	0.04	-0.045	0.02	-0.046	0.02	-0.059	0.01
MMV024311	-0.118	0.02	0.118	0.03	-0.074	0.03	0.152	0.03
MMV1019989	-0.062	0.01	-0.052	0.01	-0.099	0.03	-0.067	0.04
MMV1037162	0.062	0.05	-0.005	0.02	-0.008	0.01	0.017	0.02
MMV689437	-0.124	0	0.036	0.02	-0.031	0.04	0.09	0.05
MMV688955	-0.059	0.02	-0.117	0.02	-0.093	0.04	-0.126	0.02
MMV026468	0.017	0.03	0.027	0.08	0	0.02	0.028	0
MMV020670	-0.031	0.02	-0.134	0.02	-0.022	0.03	-0.168	0.03
MMV023953	0.118	0.11	0.073	0.04	0.083	0.04	0.113	0.02
MMV010576	0.005	0	0.009	0.02	0.011	0.01	0.039	0.02
MMV032967	-0.07	0.01	0.013	0.04	-0.046	0.02	-0.024	0.02
MMV031011	-0.114	0.03	-0.081	0.06	-0.075	0.02	-0.007	0.03
MMV688178	-0.097	0.05	-0.207	0.05	-0.059	0.03	-0.061	0.01
MMV688362	0.094	0.01	0.432	0.04	0.191	0.01	0.268	0.03
MMV687706	-0.06	0.02	0.228	0.01	0.024	0.02	0.039	0.02
MMV026356	-0.06	0.01	-0.067	0.02	-0.003	0.02	0.011	0
MMV011511	0.004	0.02	0.092	0.04	0.057	0.03	0.036	0.03
MMV007625	0.015	0.03	-0.018	0.01	0.049	0.01	0.016	0.01
MMV007471	0.004	0.02	-0.02	0.04	0.011	0.03	0.061	0.02
MMV024829	0.039	0.01	0.072	0.04	0.093	0.02	0.071	0.04
MMV045105	0.02	0.04	0.219	0.04	0.013	0.03	0.29	0.02
MMV022029	-0.078	0.02	0.144	0.07	-0.023	0.01	0.289	0.02
MMV676064	-0.052	0.02	-0.073	0.06	-0.058	0.01	0.029	0
MMV688180	-0.073	0.02	0.281	0.05	-0.039	0	0.099	0
MMV024035	-0.031	0.02	-0.049	0.03	0.051	0.01	-0.065	0.03
MMV688941	-0.032	0.03	-0.04	0.04	0.017	0.02	0.059	0.01
MMV020291	0.043	0.03	0.084	0.03	0.025	0.02	0.063	0.02
MMV006833	0.016	0.02	0.113	0.04	0.029	0.01	0.081	0.02
MMV026490	0.001	0.03	-0.132	0.05	-0.013	0.01	-0.048	0.04
MMV687246	0.289	0.01	0.494	0.04	0.239	0.03	0.388	0.03
MMV676162	0.026	0.02	0.063	0.05	0.082	0.04	0.093	0.02
MMV024114	-0.052	0.03	0.016	0.08	-0.09	0.02	0.15	0.03
MMV688467	-0.045	0.03	0.078	0.1	-0.022	0.01	0.018	0
MMV675998	0.02	0.02	0.34	0.06	0.059	0.01	0.261	0.03
MMV659010	0.082	0.03	0.093	0.02	-0.025	0.01	0.063	0
MMV676008	0.026	0.02	-0.037	0.03	-0.033	0.02	0.077	0.02
MMV676269	-0.029	0.05	-0.047	0.02	0.004	0.01	0.021	0.04
MMV020081	0.016	0.03	0.178	0.05	0.049	0.01	0.104	0.03
MMV026550	-0.048	0.04	0.002	0.05	0	0.02	0.028	0.04
MMV675995	-0.029	0.04	0.192	0.07	0.028	0	0.019	0.03
MMV688274	0.129	0.05	0.174	0.1	0.057	0.02	0.024	0.01
MMV023860	-0.013	0	0.137	0.03	-0.053	0.03	0.281	0
MMV688407	0.138	0.02	0.357	0.03	0.022	0.02	0.208	0
MMV023949	0.115	0.09	-0.031	0.01	-0.002	0.03	0.062	0.03
MMV676050	0.001	0.05	0.03	0.03	0.002	0.02	0.081	0.03
MMV024406	0.03	0.03	0.202	0.01	0.168	0.03	0.247	0.01
MMV023233	0.007	0.05	0.068	0.03	0.114	0.02	0.082	0.04
MMV085230	0.085	0.07	0.134	0.04	0.154	0.03	0.184	0.02
MMV085071	-0.001	0.06	-0.104	0.01	0.038	0.03	-0.194	0.04
MMV659004	-0.045	0.04	-0.023	0.02	-0.021	0	0.124	0.03
MMV676260	0.007	0.05	0.051	0.02	-0.094	0.04	0.012	0.01
MMV688364	-0.097	0.01	-0.153	0.07	-0.137	0.01	0	0.03
MMV032995	-0.069	0.01	-0.073	0.05	-0.048	0.01	0.002	0
MMV688279	-0.031	0.03	-0.05	0.02	-0.045	0.02	0.001	0.01
MMV688271	0.534	0.05	0.428	0.01	0.831	0.1	0.5	0.04
MMV019790	0.08	0.02	-0.003	0.01	0.032	0.02	0.042	0.02
MMV009135	-0.012	0.05	0.06	0.02	0.001	0.01	0.001	0.03
MMV011765	-0.041	0.07	-0.012	0.02	0.007	0.01	-0.005	0.02
MMV024937	0.196	0.17	0.231	0.03	0.056	0.02	0.136	0.01
MMV085499	0.086	0.08	0.456	0.05	0.005	0.03	0.246	0.04
MMV023985	-0.067	0.07	-0.01	0.08	-0.032	0.01	-0.13	0.04
MMV024195	0.011	0.01	-0.014	0.03	-0.032	0.01	0.019	0.03
MMV676063	-0.169	0.02	-0.153	0.04	-0.125	0.01	-0.033	0.01
MMV676186	-0.037	0.02	-0.05	0.03	-0.035	0.01	0.053	0.03
MMV688474	0.101	0.04	0.298	0.01	0.024	0.01	0.125	0.03
MMV687812	0.105	0.03	0.053	0.01	0.419	0.02	0.273	0
MMV007803	-0.065	0.04	-0.002	0.02	0.003	0.01	-0.017	0.03
MMV001059	-0.037	0.07	-0.008	0.02	0.009	0.02	-0.013	0.02
MMV011691	-0.017	0.05	0.013	0.05	0.018	0.02	-0.034	0.03
MMV676877	0.011	0.06	0.086	0.01	0.091	0.01	0.055	0.02
MMV663250	-0.125	0.07	-0.011	0.04	-0.003	0.01	0.101	0.01
MMV407539	-0.099	0.01	-0.032	0	-0.039	0.03	-0.031	0.03
MMV688372	-0.051	0.01	-0.107	0.06	0.042	0	0.043	0.01
MMV658993	-0.109	0.03	-0.123	0.02	-0.064	0.02	0.086	0.02
MMV676182	0.014	0.02	0.034	0.05	-0.044	0.01	0.045	0.02
MMV676411	-0.14	0.04	-0.008	0.02	-0.023	0.02	0.008	0
MMV007133	-0.071	0.03	-0.108	0.03	-0.031	0.01	-0.045	0.02
MMV022478	0.017	0.07	0.101	0.06	0.146	0.03	0.183	0.02
MMV024101	0.063	0.07	0.338	0.01	0.067	0.04	0.256	0.01
MMV676881	1.036	0	1.034	0.02	1.084	0.02	1.076	0.01
MMV024443	-0.046	0.09	-0.038	0.02	0.05	0.04	0.027	0.02
MMV688469	-0.084	0.04	-0.017	0.08	-0.09	0.01	0.045	0.02
MMV023388	0.097	0.1	0.127	0.03	0.082	0.01	0.141	0.01
MMV675968	0.203	0.01	0.224	0.04	0.066	0.02	0.256	0.01
MMV675996	-0.125	0.03	-0.102	0.01	-0.03	0.01	-0.022	0.03
MMV688980	-0.105	0.03	-0.137	0.02	-0.038	0.02	-0.006	0.03
MMV011229	-0.01	0.03	0.062	0.01	-0.009	0.02	0.014	0.03
MMV676468	-0.05	0.01	-0.02	0.03	0.025	0.03	0.004	0.05
MMV688771	-0.05	0.02	0.003	0.04	0.285	0.25	0.078	0.04
MMV687798	-0.046	0.03	-0.016	0.03	0.047	0.04	0.061	0.03
MMV688775	0.035	0.03	0.027	0.09	0.086	0.02	0.178	0.1
MMV676159	-0.132	0.03	-0.059	0.01	-0.031	0.01	-0.018	0.03
MMV393144	-0.085	0.01	-0.081	0.01	-0.146	0.01	-0.106	0.02
MMV007920	0.047	0.01	-0.007	0.02	0.07	0.05	0.112	0.01
MMV688270	-0.083	0.02	-0.08	0.01	-0.04	0.04	0.052	0.06
MMV019993	0.006	0.01	-0.036	0.01	-0.048	0.02	-0.018	0.03
MMV687794	0.047	0.01	0.245	0.01	0.078	0.02	0.266	0.01
MMV676470	-0.009	0.02	0.042	0.05	0.058	0.02	0.087	0.03
MMV688938	0.029	0.01	-0.036	0.03	0.061	0.01	0.121	0.05
MMV689000	0.108	0.01	0.092	0.04	0.103	0.02	0.099	0.05
MMV004168	-0.054	0.05	0.018	0.02	0.036	0.02	0.066	0.01
MMV676161	-0.031	0.04	-0.025	0.01	-0.013	0.01	0.017	0.01
MMV023183	0.062	0.08	0.018	0.01	0.035	0.03	0.149	0.04
MMV047015	0.15	0.05	0.039	0.01	0.011	0.02	0.055	0.01
MMV688795	0.051	0.03	0.054	0.03	0.032	0.01	0.039	0.04
MMV688352	0.049	0.03	0.119	0.05	0	0.02	0.226	0.04
MMV676398	0.08	0.04	0.089	0.02	0.065	0.03	0.277	0.05
MMV676472	0.042	0.05	-0.021	0.01	0.082	0.02	0.137	0.02
MMV671636	0.102	0.05	0.066	0.02	0.08	0.01	0.171	0.02
MMV676599	0.046	0.03	-0.051	0.03	0.086	0.02	0.106	0.02
MMV689244	0.064	0.05	-0.028	0.02	0.027	0.01	-0.032	0.02
MMV688411	0.017	0.04	0.037	0.01	-0.003	0.02	0.055	0.03
MMV687765	0.048	0.02	0.085	0.01	0.044	0.02	0.13	0.02
MMV020165	0.018	0.02	0.049	0.03	-0.017	0.01	0.116	0.05
MMV676524	0.106	0.02	0.109	0.03	0.047	0.02	0.131	0.02
MMV611037	0.061	0.03	0.05	0.02	0.002	0.02	0.04	0.01
MMV688766	0	0.01	-0.048	0.02	0.01	0.02	-0.025	0.02
MMV200748	-0.027	0.03	-0.03	0.03	0.038	0.02	0.04	0.01
MMV667494	0.317	0.05	0.728	0.01	0.394	0.01	0.526	0.01
MMV028694	0.08	0.02	0.132	0.04	0.073	0.03	0.139	0.02
MMV001499	0.051	0.03	0.109	0.08	0.071	0.02	0.075	0.03
MMV688345	-0.01	0.03	0.234	0.05	0.036	0	0.163	0.02
MMV010545	-0.032	0.01	0.069	0.07	0.008	0.01	0.036	0.03
MMV023227	-0.069	0.03	0.223	0.04	0.02	0.02	0.145	0.09
MMV687700	0.03	0.04	0.165	0.04	0.03	0.01	0.1	0.03
MMV676384	0.034	0.02	0.068	0.02	0.069	0.01	0.061	0.03
MMV020289	0.019	0.01	0.013	0.03	0.01	0.02	0.019	0.01
MMV002816	-0.005	0.01	0.001	0.02	0.025	0.02	0.019	0.01
MMV634140	0.112	0.01	0.418	0.03	0.241	0.01	0.313	0.03
MMV030734	0.075	0.01	-0.095	0.04	0.048	0.03	-0.056	0.02
MMV689243	-0.086	0.04	-0.051	0.02	0.023	0.02	-0.03	0.03
MMV676358	-0.086	0.03	-0.025	0.03	-0.028	0.03	0.077	0.03
MMV687729	-0.007	0.05	-0.065	0.02	-0.021	0.02	0.06	0.04
MMV407834	-0.031	0.05	-0.071	0.01	-0.034	0.02	0.039	0.03
MMV687813	0.053	0.03	-0.01	0.05	0.027	0.03	0.226	0.02
MMV153413	0.011	0.05	0.386	0.03	0.007	0.03	0.232	0.02
MMV019551	-0.004	0.02	0.032	0.06	-0.005	0.04	0.012	0.01
MMV688552	-0.001	0.03	0.051	0.05	0.023	0.02	0.001	0.02
MMV016838	0.017	0.01	0.003	0.04	0.043	0.03	0.076	0.01
MMV676270	0.032	0.02	-0.006	0.02	0.046	0.03	0.094	0.05
MMV688755	-0.005	0.03	0.04	0.01	0.031	0.02	0.066	0.03
MMV228911	-0.085	0.02	0.045	0.02	-0.014	0.01	0.047	0.05
MMV272144	-0.111	0.02	0.09	0.03	-0.013	0.04	0.106	0.04
MMV026313	0.004	0.01	0.189	0.04	-0.008	0.01	0.08	0.03
MMV161996	0.15	0.17	0.015	0.05	-0.022	0.03	0.09	0.04
MMV688543	-0.073	0.02	0.017	0.02	-0.012	0.02	0.075	0.03
MMV146306	-0.032	0.03	-0.065	0.04	0.006	0.02	0.018	0.03
MMV688557	-0.006	0.03	0.012	0.04	0.023	0.03	0.001	0.04
MMV021013	-0.014	0.02	0.186	0.03	0.091	0.01	0.161	0.07
MMV392832	0.059	0.03	-0.064	0.03	0.085	0.02	-0.036	0.02
MMV688754	-0.039	0.03	-0.012	0.02	0.009	0.02	0.035	0.08
MMV001561	-0.154	0.01	0.019	0.04	-0.041	0.03	0.044	0.06
MMV658988	-0.055	0.03	0.104	0.06	-0.031	0.04	0.135	0.05
MMV084864	-0.106	0.04	0.048	0.02	0	0.03	0.113	0.05
MMV676492	-0.16	0.04	0.35	0	0.102	0.15	0.267	0
MMV688415	-0.077	0.05	0.03	0.04	-0.041	0.03	0.158	0.04
MMV688330	-0.079	0.03	-0.098	0.02	-0.03	0.02	-0.112	0.03
MMV687796	-0.095	0.03	-0.058	0.04	-0.008	0.02	-0.036	0.02
MMV688939	-0.004	0.02	-0.086	0.04	-0.014	0.02	-0.041	0.01
MMV688978	-0.126	0.03	-0.627	0.08	-0.202	0.03	-0.706	0.01
MMV688990	-0.024	0.03	-0.118	0.04	-0.001	0.02	0.006	0.07
MMV688273	0.009	0.03	-0.138	0.04	-0.109	0.02	-0.184	0.06
MMV393995	-0.127	0.03	-0.068	0.05	-0.119	0.02	-0.003	0.04
MMV1236379	-0.092	0.04	-0.017	0.01	-0.081	0.06	0.068	0.03
MMV688550	-0.162	0.03	0.004	0.02	-0.043	0.03	0.032	0.02
MMV495543	-0.088	0.03	0.065	0.03	-0.165	0.1	0.034	0.03
